# Supplementary material for: The anti-apoptotic proteins NAF-1 and iASPP interact to drive apoptosis in cancer cells
Source: Royal Society of Chemistry journal article supplement (doi:10.1039/c8sc03390k), 2018-11-20
Supplement: c8sc03390k1.pdf [file c8sc03390k1.pdf]

## **The anti-apoptotic proteins NAF-1 and iASPP interact to drive apoptosis in cancer cells**

Anat Iosub-Amir<sup>a1</sup>, Fang Bai<sup>b1</sup>, Yang-Sung Sohn<sup>c</sup>, Luhua Song<sup>d</sup>, Sagi Tamir<sup>c</sup>, Henri-Baptiste Marjault<sup>c</sup>, Guy Mayer<sup>a</sup>, Ola Karmi<sup>c</sup>, Patricia A. Jennings<sup>e</sup>, Ron Mittler<sup>f</sup>, José N. Onuchic<sup>b2</sup>, Assaf Friedler<sup>a2</sup>, and Rachel Nechushtai<sup>c2</sup>

<sup>a</sup>Institute of Chemistry, The Hebrew University of Jerusalem, Edmond J. Safra Campus at Givat Ram, Jerusalem 91904, Israel; <sup>b</sup>Center for Theoretical Biological Physics and Department of Physics, Rice University, Houston, TX 77005; <sup>c</sup>The Alexander Silberman Institute of Life Science, The Hebrew University of Jerusalem, Edmond J. Safra Campus at Givat Ram, Jerusalem 91904, Israel; <sup>d</sup>Department of Biological Sciences, University of North Texas, Denton, TX 76203; <sup>e</sup>Department of Chemistry & Biochemistry, University of California at San Diego, La Jolla, CA 92093, USA; <sup>f</sup>Department of Surgery, University of Missouri School of Medicine. Christopher S. Bond Life Sciences Center University of Missouri. 1201 Rollins St, Columbia, MO 65201.

<sup>1</sup> contributed equally to this work

<sup>2</sup>corresponding authors:

José N. Onuchic

Center for Theoretical Biological Physics and Department of Physics, Rice University, Houston, TX 77005;

001-713- 3484197. jonuchic@rice.edu

Assaf Friedler

Institute of Chemistry, The Hebrew University of Jerusalem, Edmond J. Safra Campus at Givat Ram, Jerusalem

91904, Israel; 972-2-6585746, assaf.friedler@mail.huji.ac.il

Rachel Nechushtai

The Alexander Silberman Institute of Life Science, The Hebrew University of Jerusalem, Givat Ram, Jerusalem

91904;972-2-6585242, rachel@mail.huji.ac.il

Keywords: iASPP, NAF-1, Oxidative stress, Cell death, Cancer, Protein-protein interaction

## Supporting Information

### Supplementary methods

#### Peptide uptake into cells

MDA-MB-231 cancer cells were incubated with 10 $\mu$ M of FL-iASPP 764-780 for 3h and then intensively washed. Cell fluorescence was observed using a semi-confocal microscope Nikon TE2000 microscope equipped with a thermostated stage and a Hamamatsu Orca-Era CCD camera.

### Supplementary figures

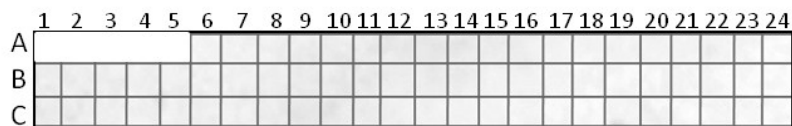

**Figure S1: Mapping the binding sites between iASPP Pro and NAF-1: Peptide array screening.** Dark spots indicate binding peptides. Binding of NAF-1 to an array of peptides derived from iASPP Pro. NAF-1 did not bind any peptides derived from iASPP Pro.

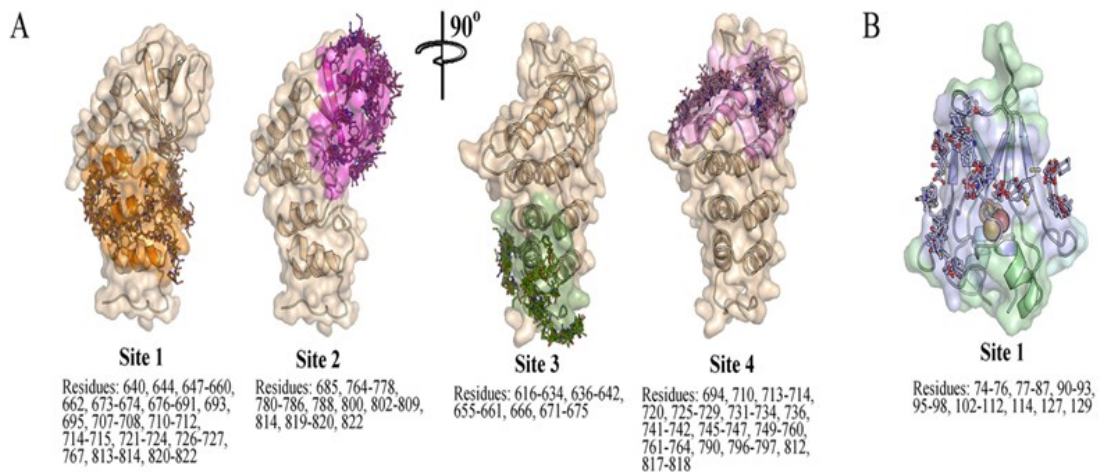

**Figure S2: Identifying candidate protein-protein binding sites for iASPP and NAF-1.** (A) Four candidate binding sites were obtained on the surface of iASPP and (B) one for NAF-1.

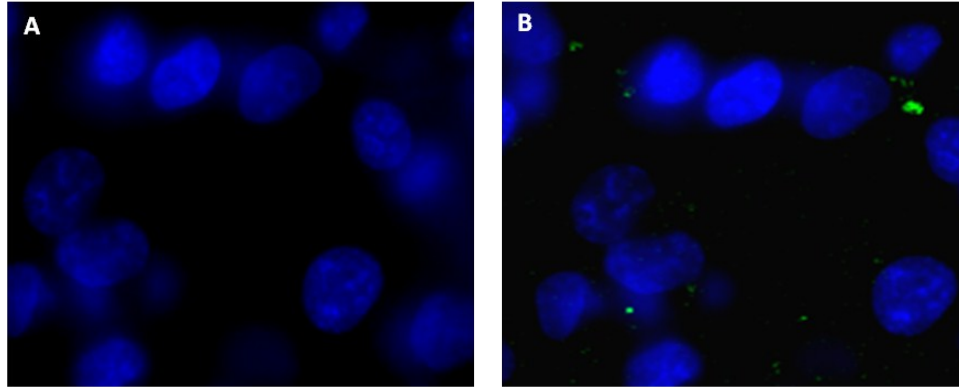

**Figure S3: Uptake of FL-peptide (iASPP 764-780) into MDA-MB-231 cancer cells.** For cell imaging, cells were incubated with (A) no peptide or (B) 10 $\mu$ M of FL-peptides for 3 h and then intensively washed. Cell fluorescence was observed using semi-confocal microscope Nikon TE2000 microscope equipped with a thermostated stage and a Hamamatsu Orca-Era CCD camera.

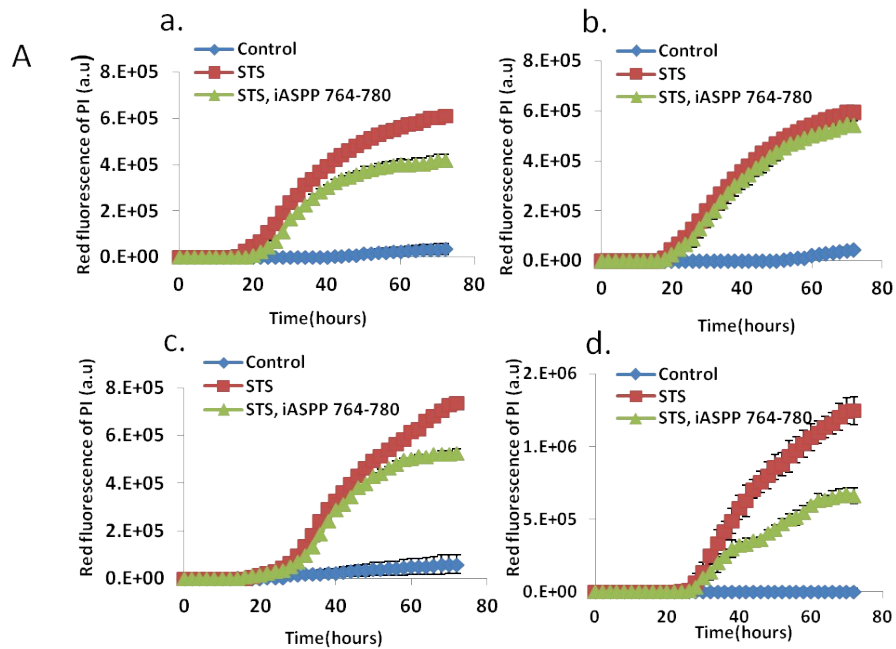

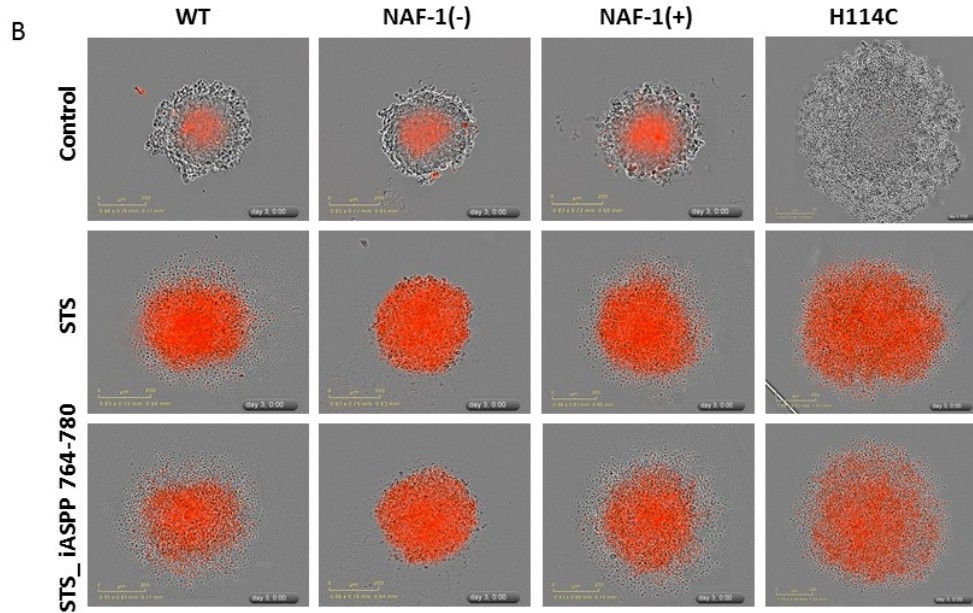

**Figure S4: The effect of iASPP 764-780 on the viability of MDA-MB-231 spheroids with altered NAF-1 expression/function.** Four different cell lines were used: WT, NAF-1(-), NAF-1(+), and H114C. (A) Time-dependent effect of iASPP 764-780 on cytotoxicity in spheroids of MDA-MB-231 cancer cells. Cytotoxicity was measured using propidium iodide. (a) WT cells, (b) NAF-1 suppressed cells, (c) NAF-1 over-expressed cells (d) H114C mutant cells. The graphs show untreated cells (blue), cells treated with STS (red), and cells treated with STS and iASPP 764-780 (green); (B) Representative spheroid images taken at day 3: WT NAF-1 expression, NAF-1 (-) with suppressed NAF-1 protein levels, NAF-1(+), with over-expressed NAF-1 protein levels, and H114C with H114C mutant in NAF-1 protein. Cells were treated with or without iASPP 764-780 in the presence of STS.

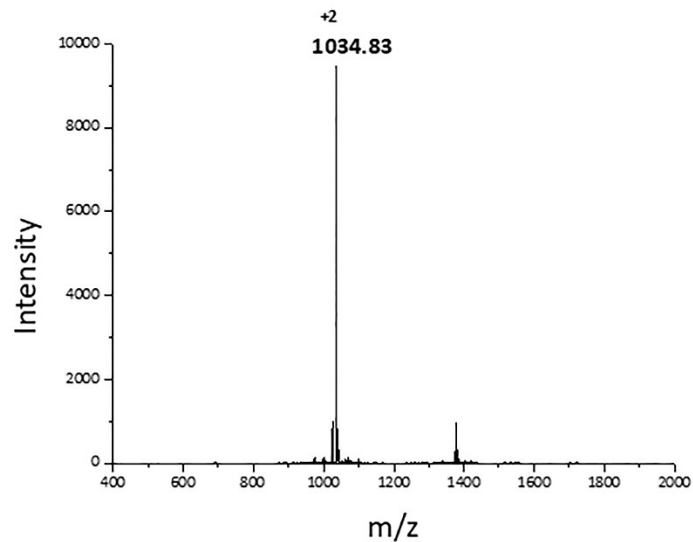

**Figure S5: ESI-MS of iASPP 764-780.** The calculated Mass is 2068.21 Da and the observed mass is 2067.64 Da.

## Supplementary Tables

**Table S1: Peptides derived from iASPP Ank-SH3 included in the peptide array**

| peptide array position | Peptide sequence | Peptide name  |
|------------------------|------------------|---------------|
| A/B 1                  | PQSMEMRSVLRKAGS  | iASPP 602-616 |
| A/B 2                  | KAGSPRKARRARLNP  | iASPP 613-627 |
| A/B 3                  | ARRARLNPLVLLLLDA | iASPP 620-634 |
| A/B 4                  | LLDAALTGELEVQ    | iASPP 631-645 |
| A/B 5                  | GELEVQAVKEMND    | iASPP 638-652 |
| A/B 6                  | EMNDPSQPNEEGITA  | iASPP 649-663 |
| A/B 7                  | PNEEGITALHNAICG  | iASPP 656-670 |
| A/B 8                  | AICGANYSIVDFLIT  | iASPP 667-681 |
| A/B 9                  | SIVDFLITAGANVNS  | iASPP 674-688 |
| A/B 10                 | NVNSPDSHGWTPLHC  | iASPP 685-699 |
| A/B 11                 | HGWTPLHCAASCNDT  | iASPP 692-706 |
| A/B 12                 | CNDTVICMALVQHGA  | iASPP 703-717 |
| A/B 13                 | MALVQHGAEIFATTL  | iASPP 710-724 |
| A/B 14                 | ATTLSDGATAFEKCD  | iASPP 721-735 |
| A/B 15                 | ATAFEKCDPYREGYA  | iASPP 728-742 |
| A/B 16                 | EGYADCATYLADVEQ  | iASPP 739-753 |
| A/B 17                 | TYLADVEQSMGLMNS  | iASPP 746-760 |
| A/B 18                 | LMNSGAVYALWDYSA  | iASPP 757-771 |
| A/B 19                 | YALWDYSAEFGDELS  | iASPP 764-778 |
| A/B 20                 | DELSFREGESVTVLR  | iASPP 775-789 |
| A/B 21                 | GESVTVLRDGPPEET  | iASPP 782-796 |
| A/B 22                 | PEETDWWAALHGQE   | iASPP 793-807 |
| A/B 23                 | WAALHGQEGYVPRNY  | iASPP 800-814 |
| A/B 24                 | YFGLFPRVKPQRSKV  | iASPP 814-828 |

**Table S2: Peptides derived from iASPP Pro included in the peptide array**

|     | Peptide name | Peptide sequence |
|-----|--------------|------------------|
| A 6 | iASPP 1-15   | ADSEAFQSARDFLDM  |
| A 7 | iASPP 8-22   | SARDFLDMNFQSLAM  |
| A 8 | iASPP 19-33  | SLAMKHMDLKQMELD  |
| A 9 | iASPP 26-40  | DLKQMELDTAAAKVD  |
| A10 | iASPP 37-51  | AKVDELTKQLESLWS  |
| A11 | iASPP 44-58  | KQLESLWSDSPAPPG  |
| A12 | iASPP 55-69  | APPGPQAGPPSRPPR  |
| A13 | iASPP 62-76  | GPPSRPPRYSSSSIP  |

|     |               |                  |
|-----|---------------|------------------|
| A14 | iASPP 73-87   | SSIPEPFGSRGSPRK  |
| A15 | iASPP 80-94   | GSRGSPRKAATDGAD  |
| A16 | iASPP 91-105  | DGADTFGRSESAPT   |
| A17 | iASPP 98-112  | GRSESAPTLHPYSPL  |
| A18 | iASPP 109-123 | YSPLSPKGRPSSPRT  |
| A19 | iASPP 116-130 | GRPSSPRTPLYLQPD  |
| A20 | iASPP 127-141 | LQPDAYGSLDRATSP  |
| A21 | iASPP 134-148 | SLDRATSPRPRAFDG  |
| A22 | iASPP 145-159 | AFDGAGSSLGRAPSP  |
| A23 | iASPP 152-166 | SLGRAPSPRPGGPL   |
| A24 | iASPP 163-177 | PGPLRQQGPPTPFD   |
| B 1 | iASPP 170-184 | GPPTPFDFLGRAGSP  |
| B 2 | iASPP 181-195 | AGSPRGSPLAEGPQA  |
| B 3 | iASPP 188-202 | PLAEGPQAFFPERGP  |
| B 4 | iASPP 199-213 | ERGSPRPPATAYDA   |
| B 5 | iASPP 206-220 | PPATAYDAPASAFGS  |
| B 6 | iASPP 217-231 | AFGSSLLGSGGSAFA  |
| B 7 | iASPP 224-238 | GSGGSAFAPPLRAQD  |
| B 8 | iASPP 235-249 | RAQDDLTLRRRPPKA  |
| B 9 | iASPP 242-256 | LRRRPPKAWNESDLD  |
| B10 | iASPP 253-267 | SDLDVAYEKKPSQTA  |
| B11 | iASPP 260-274 | EKKPSQTASIERLDV  |
| B12 | iASPP 271-285 | RLDVFARPASPSLQL  |
| B13 | iASPP 278-292 | PASPSLQLLPWRESS  |
| B14 | iASPP 289-303 | RESSLDGLGGTGKDN  |
| B15 | iASPP 296-310 | LGGTGKDNLTSATLP  |
| B16 | iASPP 307-321 | ATLPRNYKVSPLASD  |
| B17 | iASPP 314-328 | KVSPLASDRRSDAGS  |
| B18 | iASPP 325-339 | DAGSYRRSLGSAGPS  |
| B19 | iASPP 332-346 | SLGSAGPSGTLPRSW  |
| B20 | iASPP 343-357 | PRSWQPVSRIPMPPS  |
| B21 | iASPP 350-364 | SRIPMPPSSPQPRGA  |
| B22 | iASPP 361-375 | PRGAPRQRP IPLSMI |
| B23 | iASPP 368-382 | RPIPLSMIFKLQNAF  |
| B24 | iASPP 379-393 | QNAFWEHGASRAMLP  |
| C 1 | iASPP 386-400 | GASRAMLPGSPLFTR  |
| C 2 | iASPP 397-411 | LFTRAPPPKLQPQPQ  |
| C 3 | iASPP 404-418 | PKLQPQPQPQPQS    |
| C 4 | iASPP 415-429 | QPQSQPQPQLPPQPQ  |
| C 5 | iASPP 422-436 | PQLPPQPQTQPQTPT  |
| C 6 | iASPP 433-447 | QTPTPAPQHQPQTWP  |
| C 7 | iASPP 440-454 | QHPQQTWPPVNEGPP  |
| C 8 | iASPP 451-465 | EGPPKPPTELEPEPE  |
| C 9 | iASPP 458-472 | TELEPEPEIEGLLTP  |

|     |               |                  |
|-----|---------------|------------------|
| C10 | iASPP 469-483 | LLTPVLEAGDVDEGP  |
| C11 | iASPP 476-490 | AGDVDEGPFVARPLSP |
| C12 | iASPP 487-501 | PLSPTRLQPALPPEA  |
| C13 | iASPP 494-508 | QPALPPEAQSVPELE  |
| C14 | iASPP 505-519 | PELEEVARVLAIEIPR |
| C15 | iASPP 512-526 | RVLAEIPRPLKRRGS  |
| C16 | iASPP 523-537 | RRGSMEQAPAVALLPP |
| C17 | iASPP 530-544 | APAVALLPPTHKKQYQ |
| C18 | iASPP 541-555 | KQYQQIISRLFHRHG  |
| C19 | iASPP 548-562 | SRLFHRHGGPGGGP   |
| C20 | iASPP 559-573 | PGGPEPELSPITEGS  |
| C21 | iASPP 566-580 | LSPITEGSEARAGPP  |
| C22 | iASPP 577-591 | AGPPAPAPPAPIPPP  |
| C23 | iASPP 584-598 | PPAPIPPPAPSPQSSP |
| C24 | iASPP 595-609 | QSSPPEQPQSMEMRS  |

**Table S3: Peptide array used for alanine scan of iASPP 764-778**

| peptide array position | Peptide sequence | Peptide name        |
|------------------------|------------------|---------------------|
| C1                     | AALWDYSAEFGDELS  | iASPP 764-778 Y764A |
| C2                     | YAAWDYSAEFGDELS  | iASPP 764-778 L766A |
| C3                     | YALADYSAEFGDELS  | iASPP 764-778 W767A |
| C4                     | YALWAYS EFGDELS  | iASPP 764-778 D768A |
| C5                     | YALWDASAEFGDELS  | iASPP 764-778 Y769A |
| C6                     | YALWDYAAEFGDELS  | iASPP 764-778 S770A |
| C7                     | YALWDYSAAEFGDELS | iASPP 764-778 E772A |
| C8                     | YALWDYSAEAGDELS  | iASPP 764-778 F773A |
| C9                     | YALWDYSAEFADELS  | iASPP 764-778 G774A |
| C10                    | YALWDYSAEFGAELS  | iASPP 764-778 D775A |
| C11                    | YALWDYSAEFGDALS  | iASPP 764-778 E776A |
| C12                    | YALWDYSAEFGDEAS  | iASPP 764-778 L777A |
| C13                    | YALWDYSAEFGDELA  | iASPP 764-778 S778A |

**Table S4: Top 20 DI-ranked residue pairs computed with DCA for interaction between NAF-1 and iASPP.**

| Residue in NAF-1 | Residue in IASSP | MI       | DI       |
|------------------|------------------|----------|----------|
| 78               | 709              | 0.441383 | 1.00764  |
| 80               | 814              | 0.279379 | 0.994566 |
| 76               | 780              | 0.435899 | 0.937921 |
| 94               | 655              | 0.583294 | 0.903548 |
| 97               | 781              | 0.311647 | 0.881439 |
| 94               | 774              | 0.440141 | 0.880342 |
| 80               | 774              | 0.432062 | 0.867212 |
| 94               | 773              | 0.56617  | 0.855003 |
| 115              | 773              | 0.4334   | 0.835885 |
| 76               | 773              | 0.386364 | 0.834587 |
| 80               | 653              | 0.413315 | 0.833971 |
| 94               | 804              | 0.489086 | 0.825877 |
| 84               | 767              | 0.359676 | 0.822661 |
| 74               | 651              | 0.333779 | 0.821456 |
| 74               | 802              | 0.293356 | 0.816544 |
| 80               | 682              | 0.596889 | 0.815193 |
| 131              | 681              | 0.363302 | 0.8124   |
| 97               | 804              | 0.237167 | 0.809175 |
| 106              | 652              | 0.231318 | 0.80807  |
| 86               | 804              | 0.360061 | 0.807675 |

DCA, direct coupling analysis; DI, direct information; MI, mutation information.  
 Data in red represent co-evolving residue pairs.
